# Supplementary material
Source: publisher figshare collection journal article supplement (https://acs.figshare.com/ndownloader/files/18608927)
Supplement: Supplementary file 1 [file 18608927]

# **Supporting Information**

---

## **Probing the role of Anions in Influencing the Structure, Stability and Properties in Neutral N-donor Linker based Metal-Organic Frameworks**

**Aamod V. Desai,<sup>a,#</sup> Shivani Sharma,<sup>a,#</sup> Arkendu Roy<sup>a</sup> and Sujit K. Ghosh<sup>a,b,\*</sup>**

<sup>a</sup> Department of Chemistry, Indian Institute of Science Education and Research (IISER), Dr. Homi Bhabha Road, Pashan, Pune - 411008, Maharashtra, India

<sup>b</sup> Centre for Energy Science, IISER Pune, India

**\*E-mail:** [sgghosh@iiserpune.ac.in](mailto:sgghosh@iiserpune.ac.in)

**#** *These authors contributed equally*

---

## Figures:

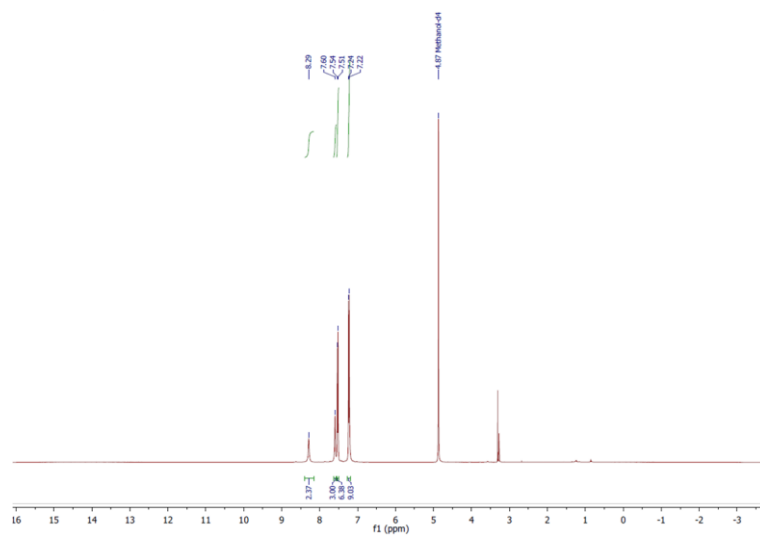

**Figure S1:** <sup>1</sup>H-NMR for ligand (L) recorded in CD<sub>3</sub>OD.

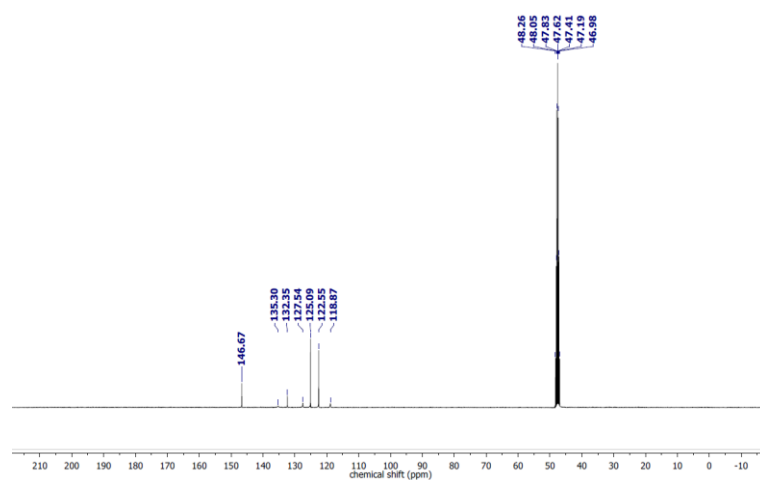

**Figure S2:** <sup>13</sup>C-NMR for ligand (L) recorded in CD<sub>3</sub>OD.

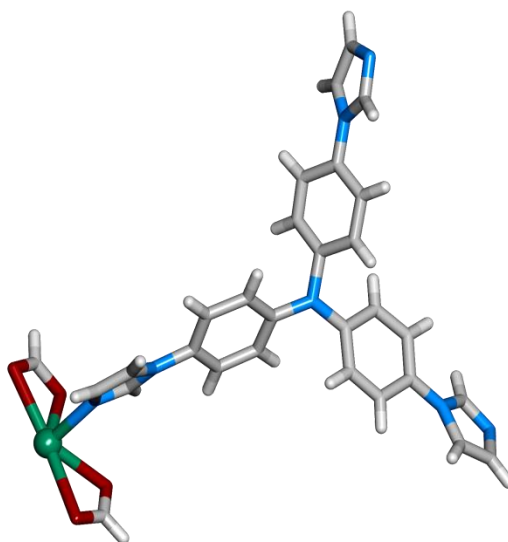

**Figure S3:** Asymmetric unit of **IPM-311**. (Colour code: C, grey; N, blue; Cd, green; O, dark red; H, white)

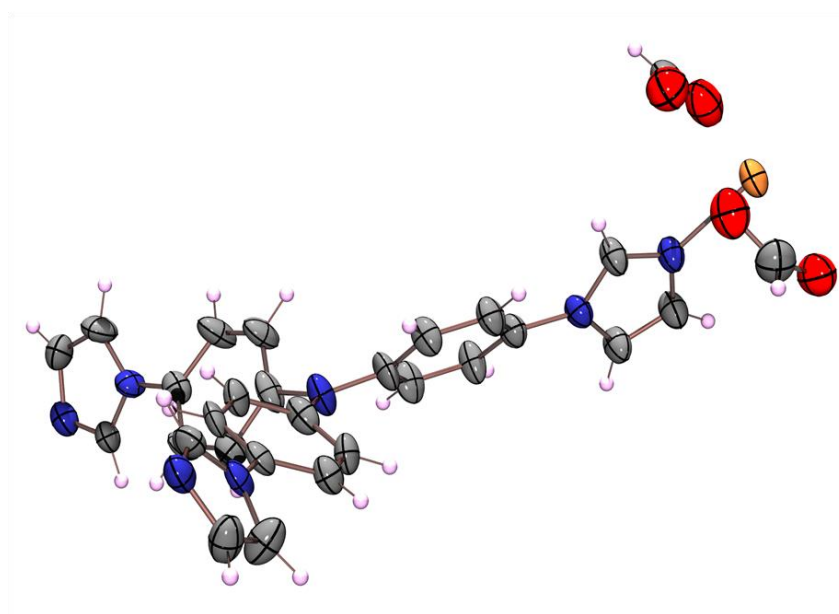

**Figure S4:** ORTEP diagram of **IPM-311** in thermal ellipsoids 50% probability. (Colour code: C, grey; N, blue; Cd, orange; O, dark red; H, pink)

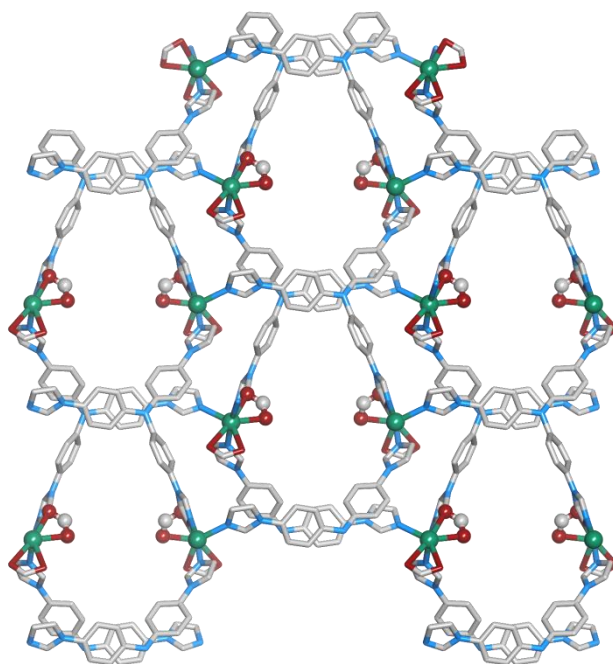

**Figure S5:** Figure showing packing of **IPM-311** along crystallographic *c*-axis, (Hydrogen atoms have been omitted for clarity. Colour code: C, grey; N, blue; Cd, green; O, dark red)

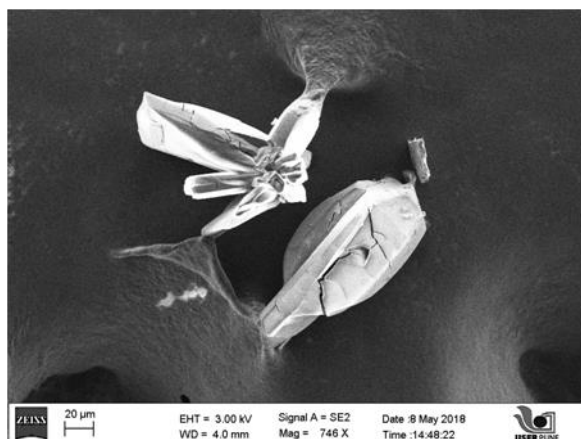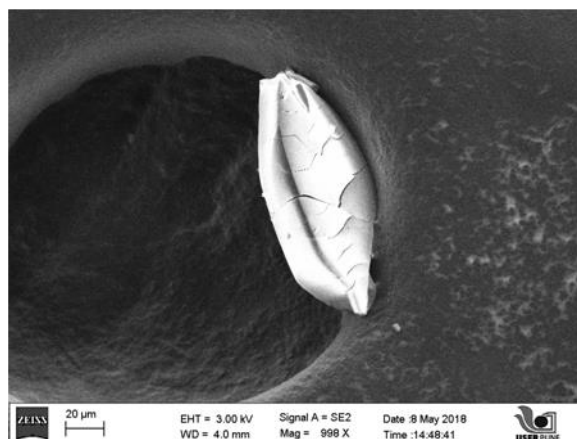

**Figure S6:** FESEM images for compound **IPM-311**. The images were recorded for the solid sample on carbon tape.

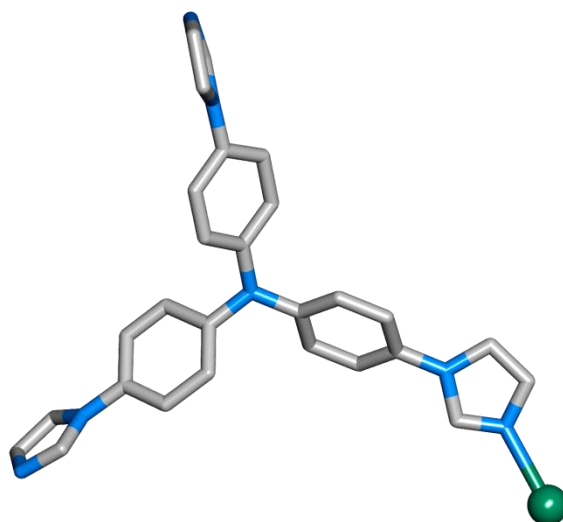

**Figure S7:** Asymmetric unit of **IPM-206**. (Colour code: C, grey; N, blue; Cd, green. H-atoms are omitted for clarity)

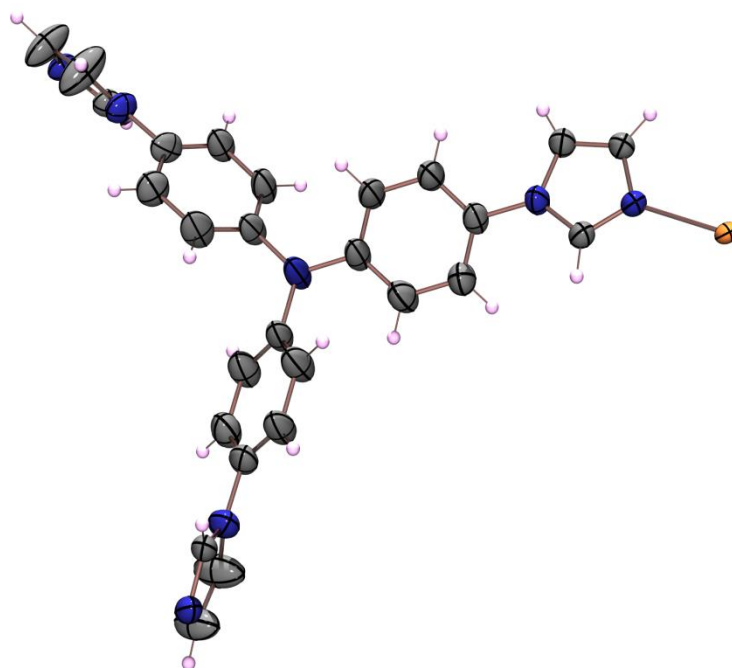

**Figure S8:** ORTEP diagram of **IPM-206** in thermal ellipsoids 50% probability. (Colour code: C, grey; N, blue; Cd, orange; H, pink)

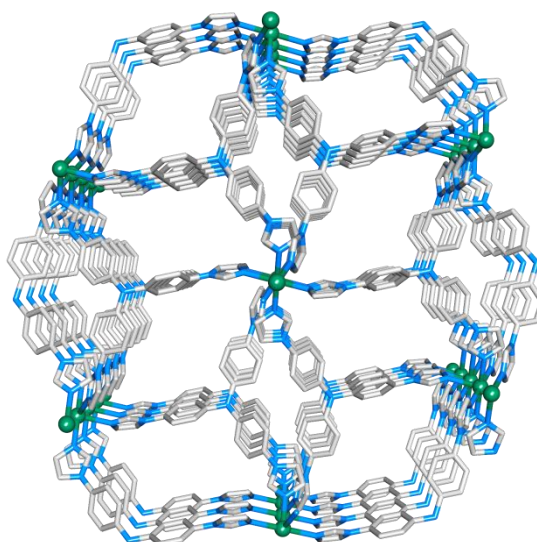

**Figure S9:** Figure showing packing of **IPM-206** along crystallographic *b*-axis (Hydrogen atoms have been omitted for clarity. Colour code: C, grey; N, blue; Cd, green)

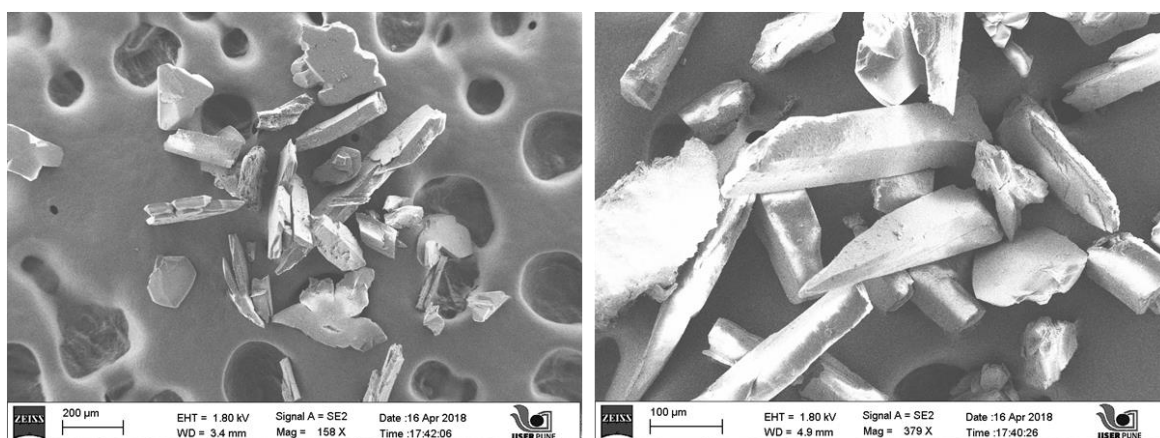

**Figure S10:** FESEM images for compound **IPM-206**. The images were recorded for the solid sample on carbon tape.

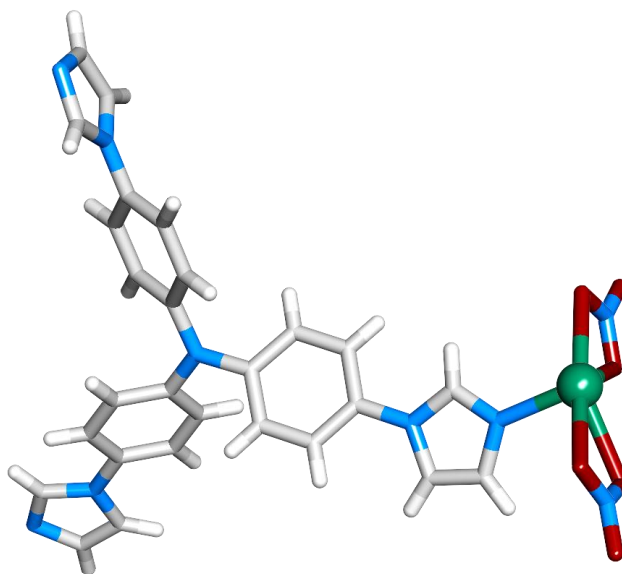

**Figure S11:** Asymmetric unit of **IPM-310**. (Colour code: C, grey; N, blue; Cd, green; O, dark red; H, white)

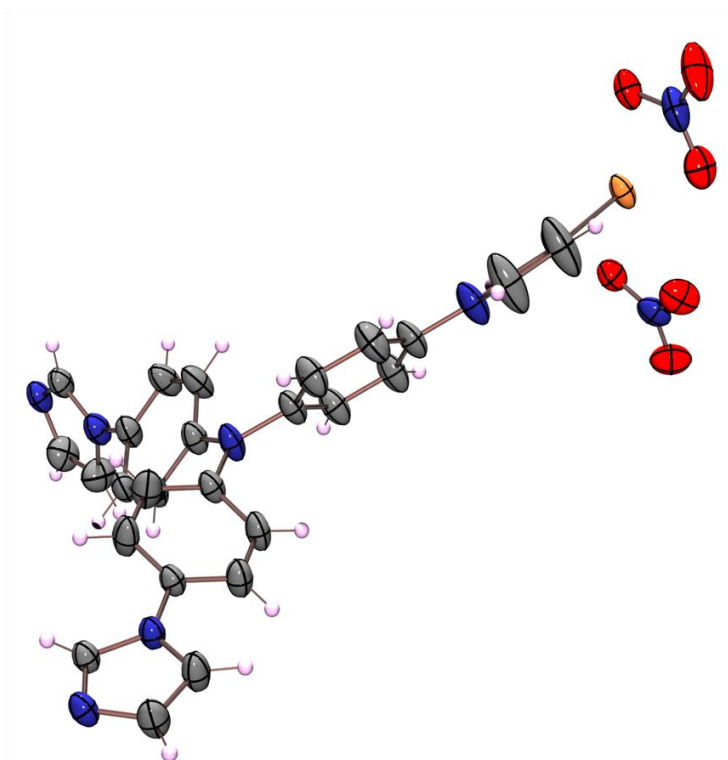

**Figure S12:** ORTEP diagram of **IPM-310** in thermal ellipsoids 50% probability. (Colour code: C, grey; N, blue; Cd, orange; O, red; H, pink)

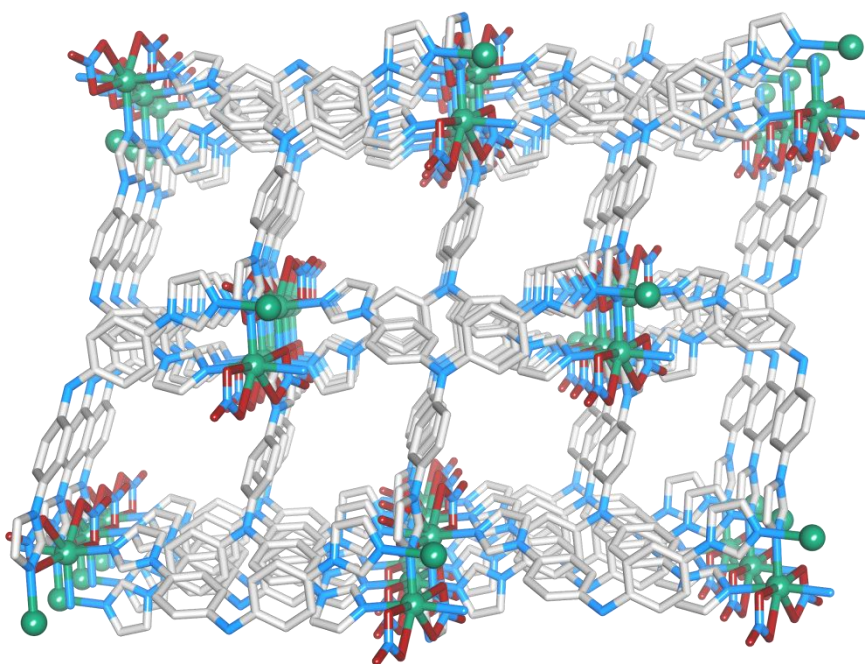

**Figure S13:** Figure showing packing of **IPM-310** along crystallographic *b*-axis. (Hydrogen atoms have been omitted for clarity. Colour code: C, grey; N, blue; Cd, green)

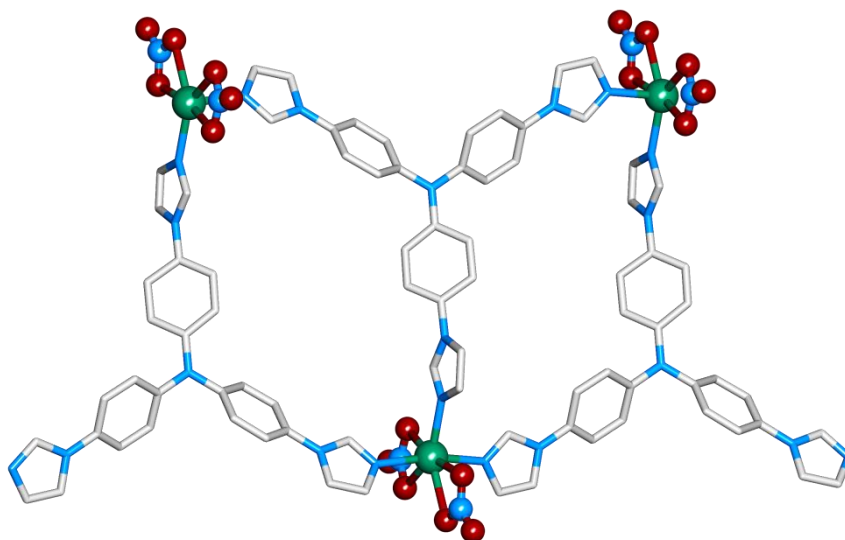

**Figure S14:** Figure showing one-dimensional packing of **IPM-310** showing coordinated nitrate anions. (Hydrogen atoms have been omitted for clarity. Colour code: C, grey; N, blue; Cd, green; O, red)



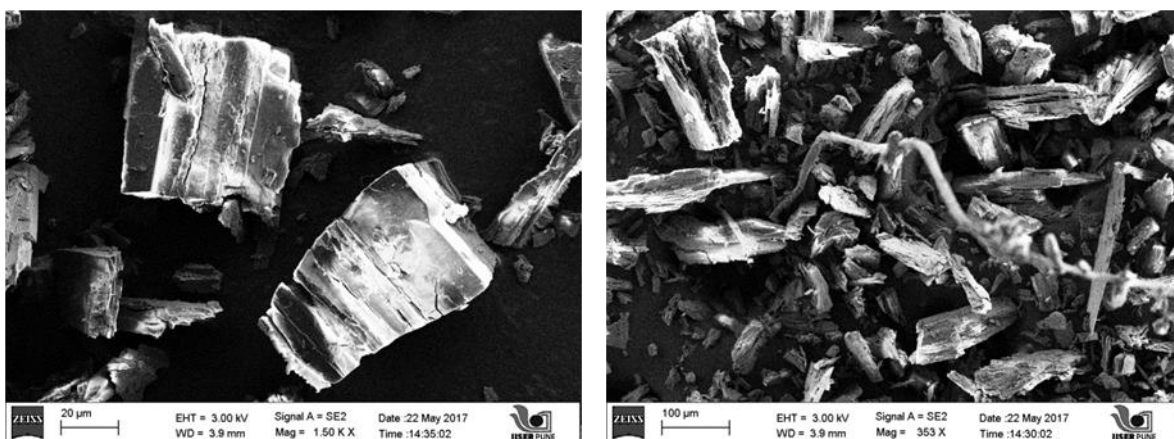

**Figure S15:** FESEM images for compound **IPM-310**. The images were recorded for the solid sample on carbon tape.

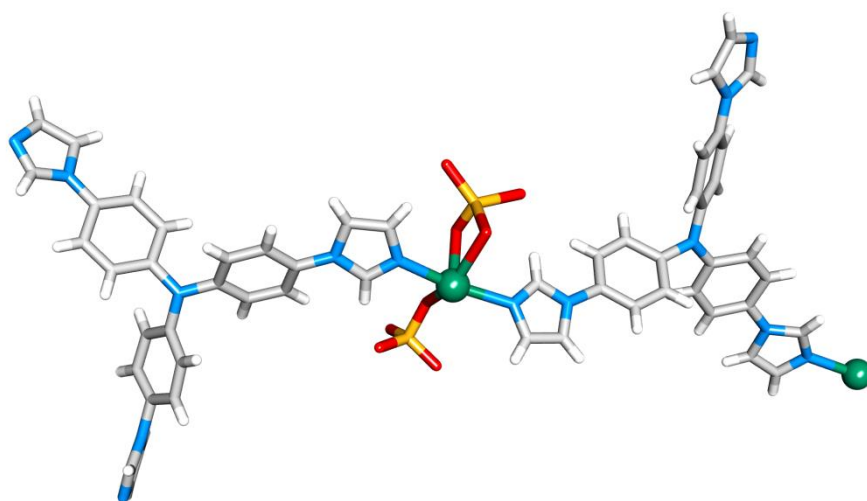

**Figure S16:** Asymmetric unit of **IPM-312**. (Colour code: C, grey; N, blue; Cd, green; O, dark red; H, white; S, yellow)

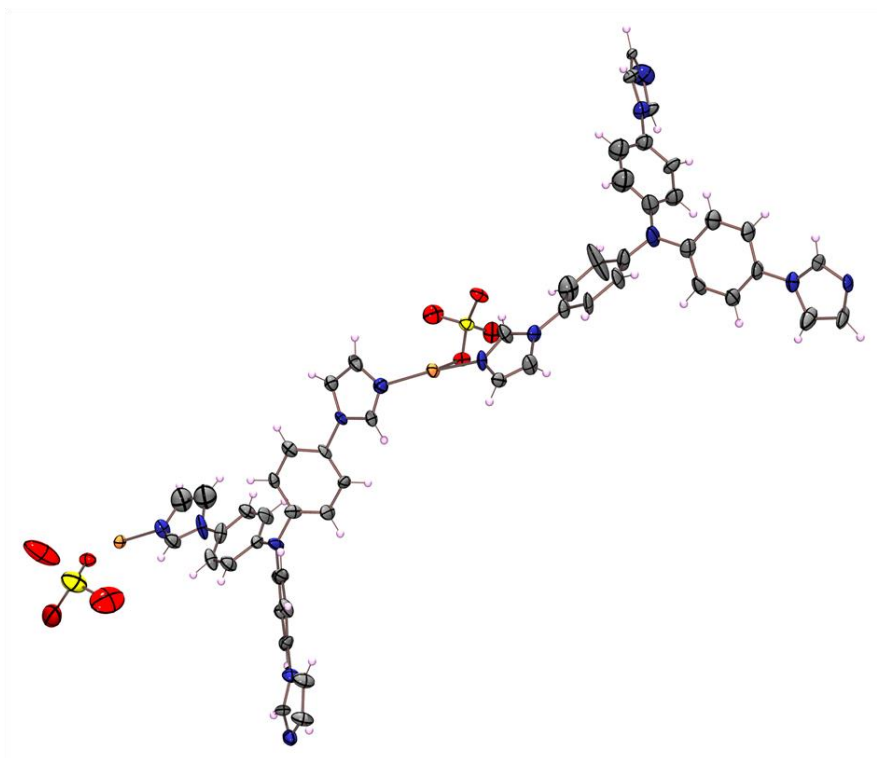

**Figure S17:** ORTEP diagram of **IPM-312** in thermal ellipsoids 50% probability. (Colour code: C, grey; N, blue; Cd, orange; O, red; S, yellow; H, pink)

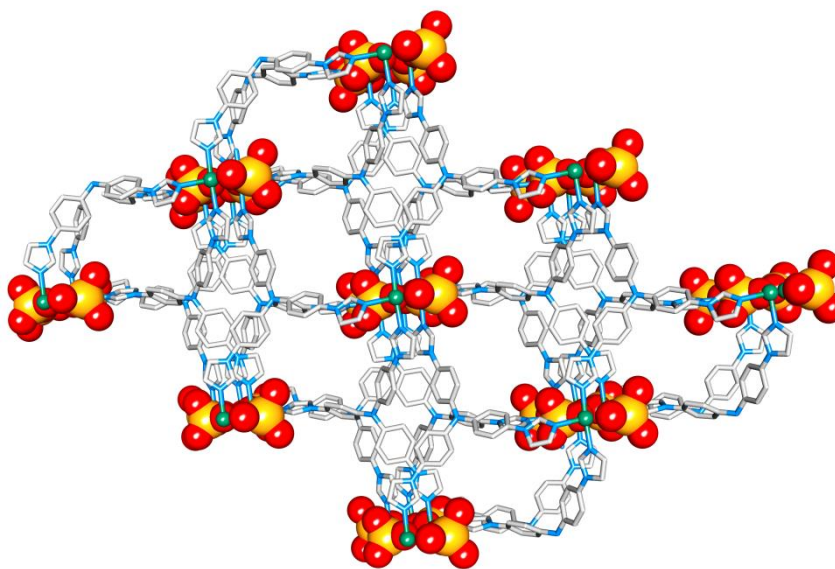

**Figure S18:** Figure showing packing of **IPM-312** along crystallographic *b*-axis, (Hydrogen atoms have been omitted for clarity. Colour code: C, grey; N, blue; Cd, green; O, red; S, yellow).

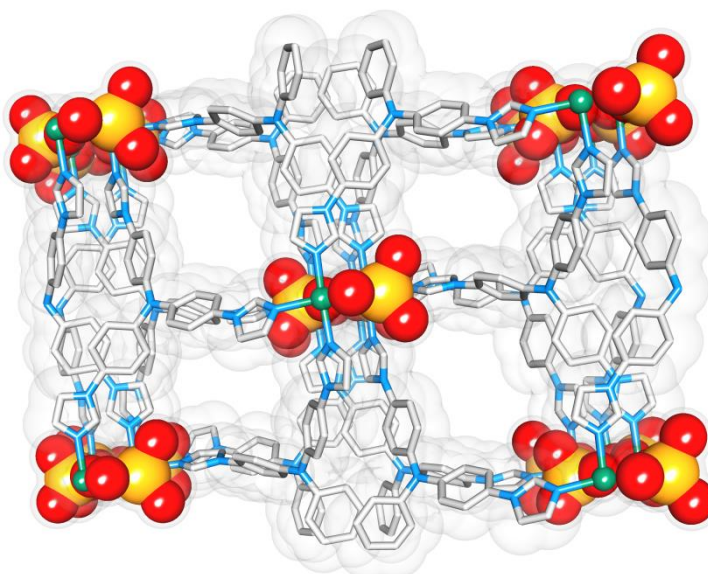

**Figure S19:** Figure showing packing of **IPM-312** along crystallographic *b*-axis, (Hydrogen atoms have been omitted for clarity. Colour code: C, grey; N, blue; Cd, green; O, red; S, yellow)

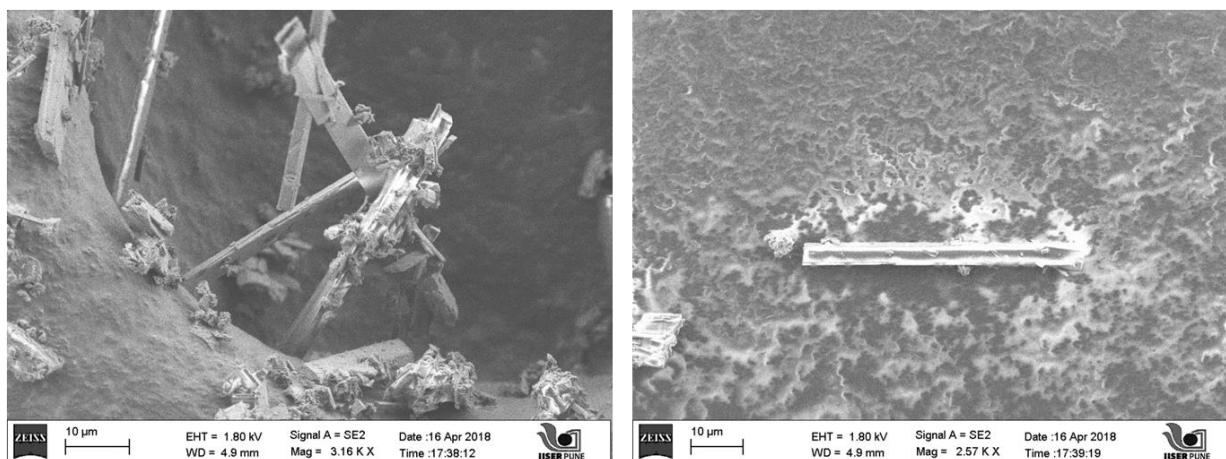

**Figure S20:** FESEM images for compound **IPM-312**. The images were recorded for the solid sample on carbon tape.

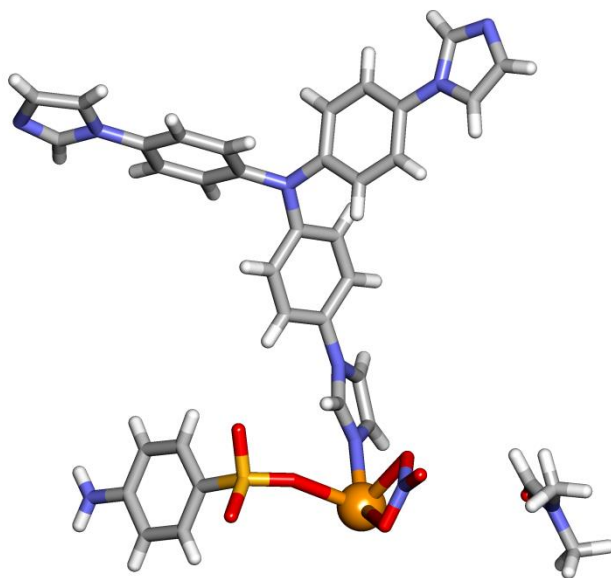

**Figure S21:** Asymmetric unit of **IPM-315**. (Colour code: C, grey; N, blue; Cd, orange; O, dark red; H, white; S, yellow)

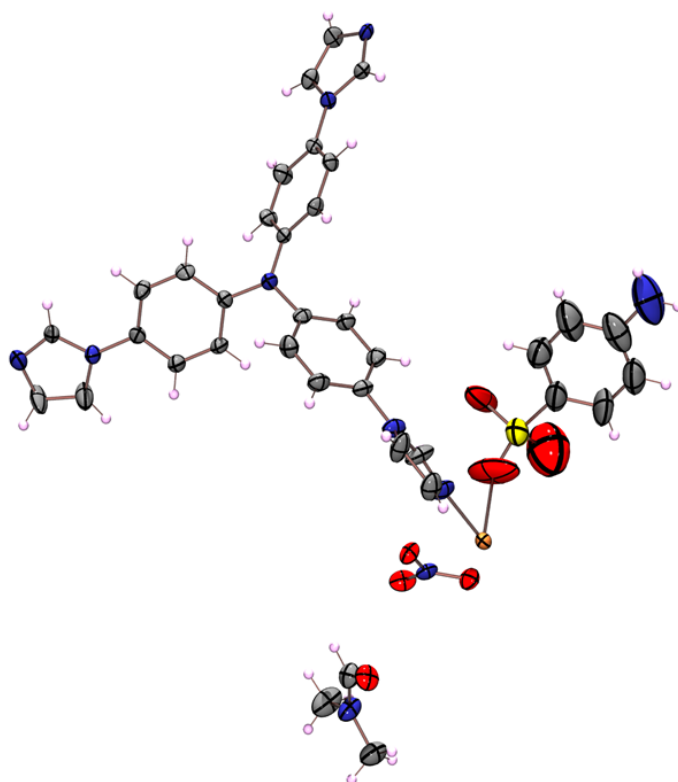

**Figure S22:** ORTEP diagram of **IPM-315** in thermal ellipsoids 50% probability. (Colour code: C, grey; N, blue; Cd, orange; O, red; H, pink)



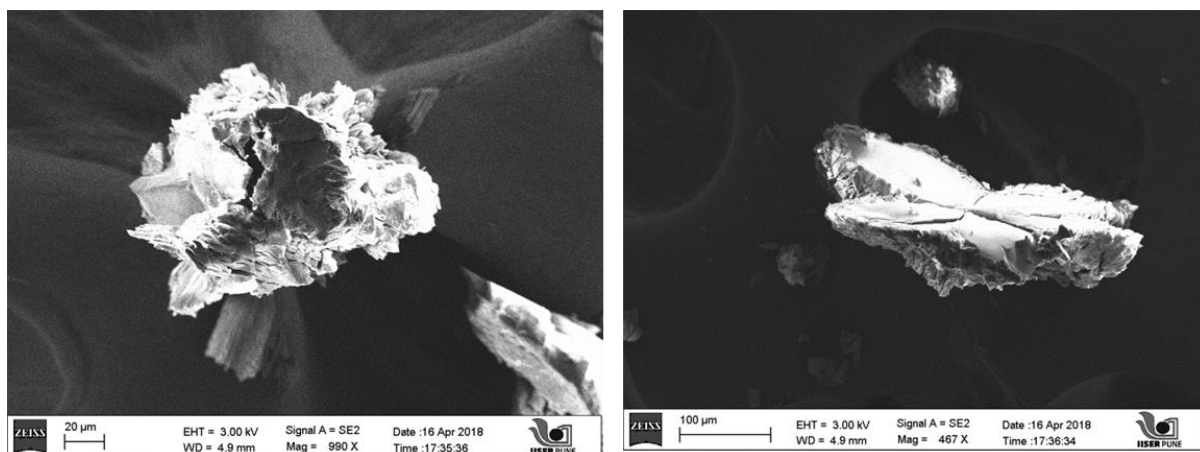

**Figure S23:** FESEM images for compound **IPM-315**. The images were recorded for the solid sample on carbon tape.

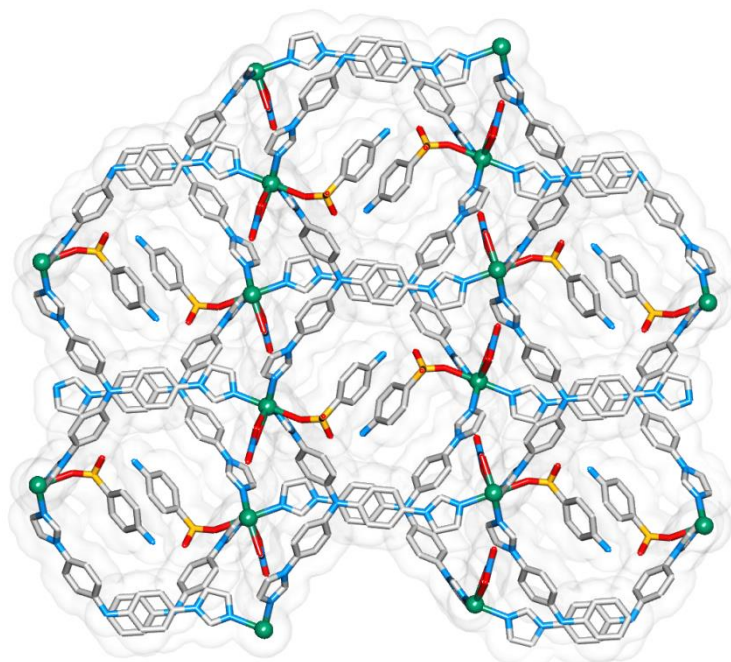

**Figure S24:** Figure showing packing of **IPM-315** along crystallographic *a*-axis. Guest solvent have been omitted for clarity. (Hydrogen atoms have been omitted for clarity. Colour code: C, grey; N, blue; Cd, green; O, red; S, yellow).

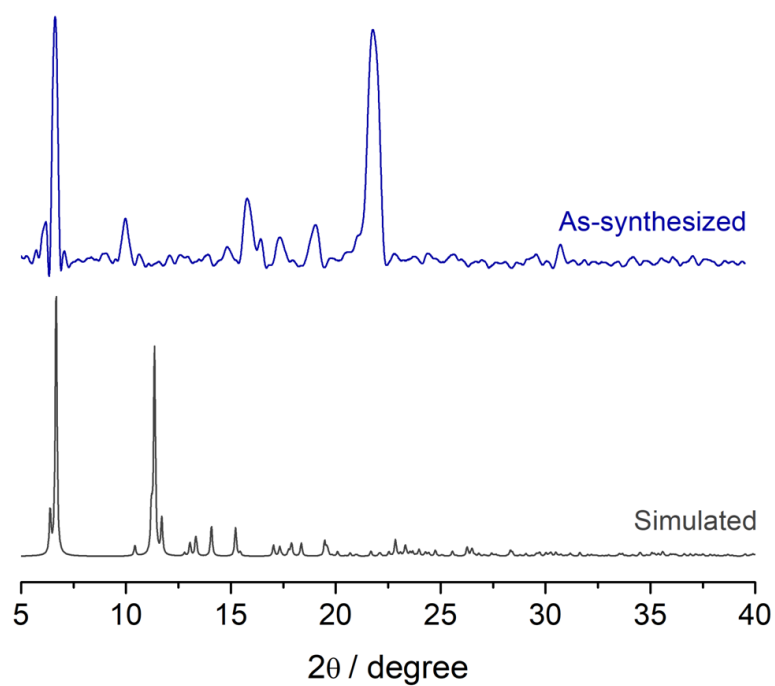

**Figure S25:** Powder X-ray diffraction patterns of **IPM-206**, simulated (grey), as-synthesized (blue).

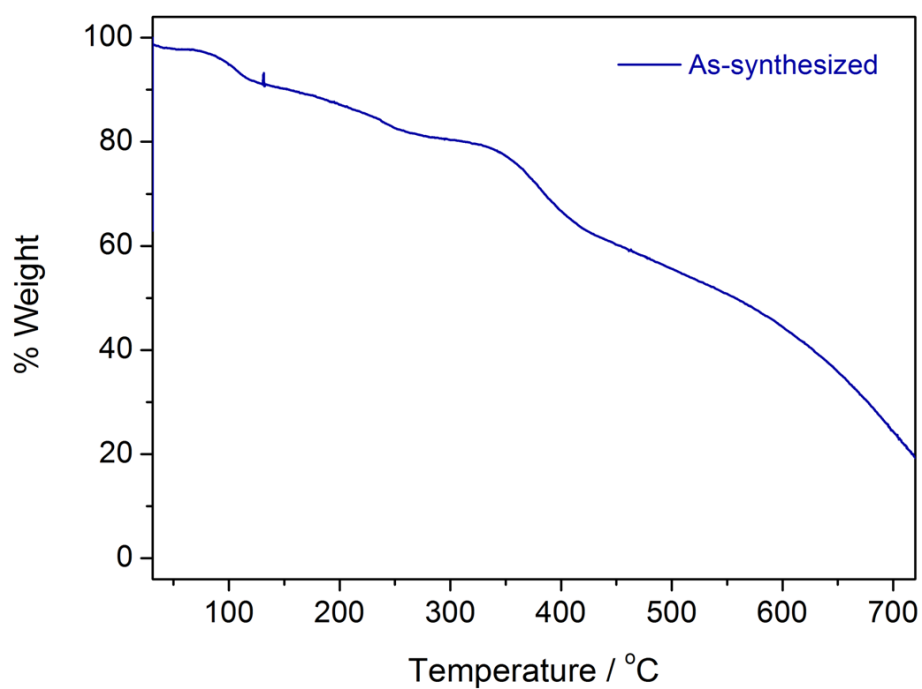

**Figure S26:** TGA profile for compound **IPM-206**.

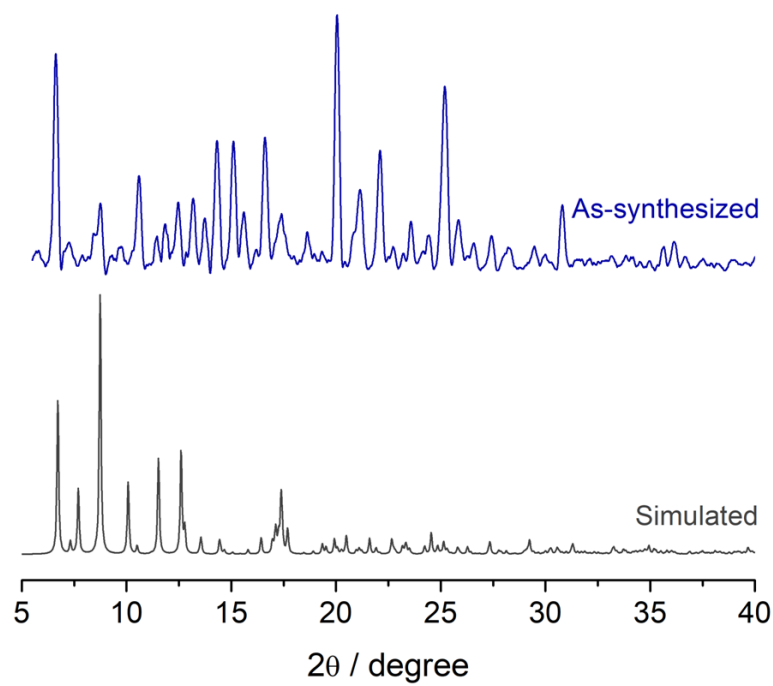

**Figure S27:** Powder X-ray diffraction patterns of **IPM-310**, simulated (grey), as-synthesized (blue).

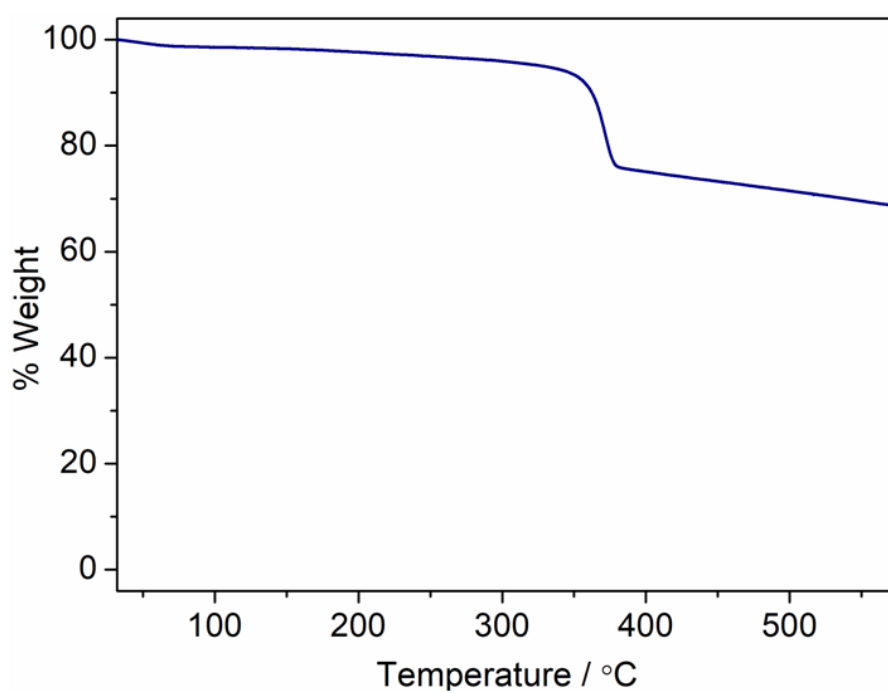

**Figure S28:** TGA profile for compound **IPM-310**.

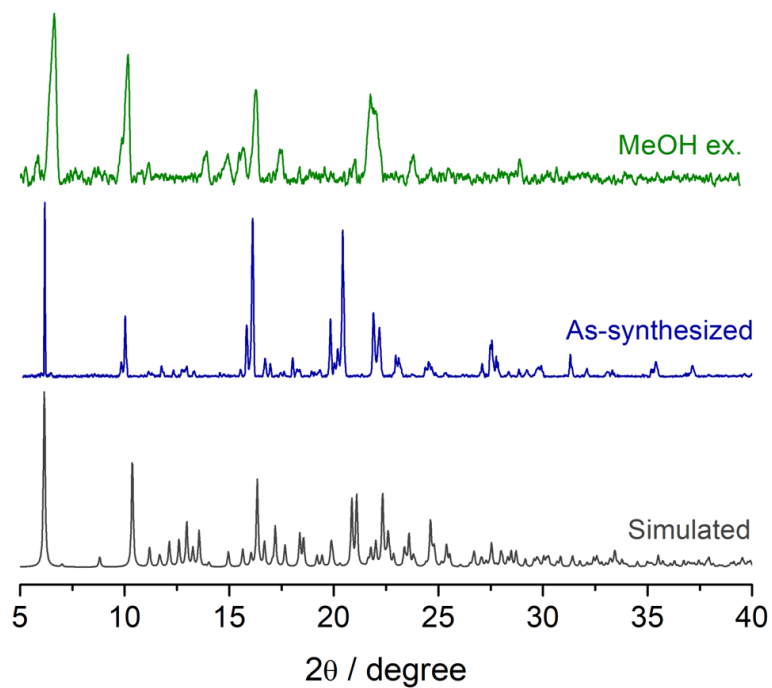

**Figure S29:** Powder X-ray diffraction patterns of **IPM-315**, simulated (grey), as-synthesized (blue), MeOH exchanged (green).

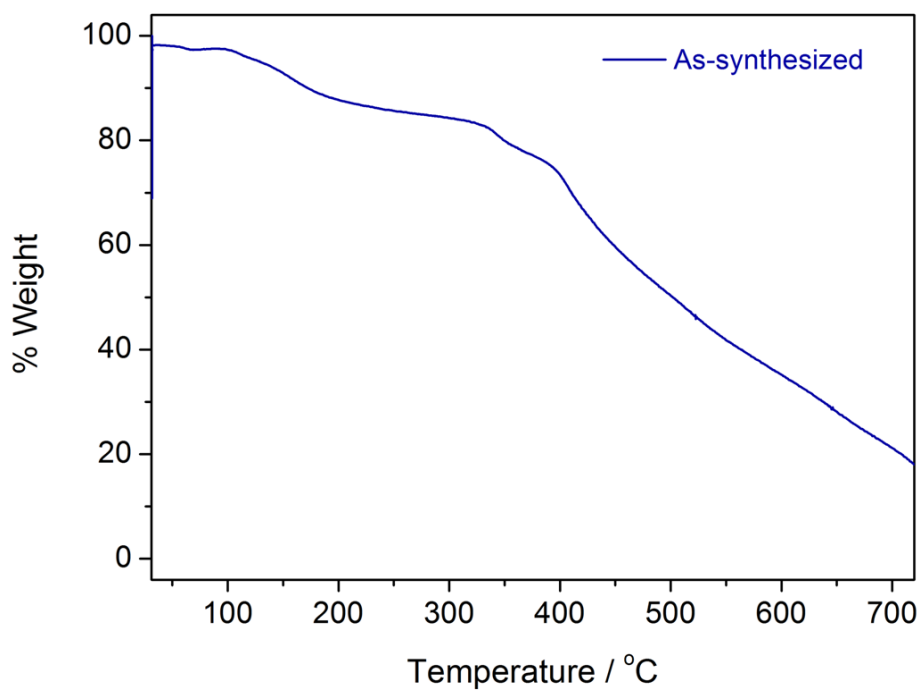

**Figure S30:** TGA profile for compound **IPM-315**.



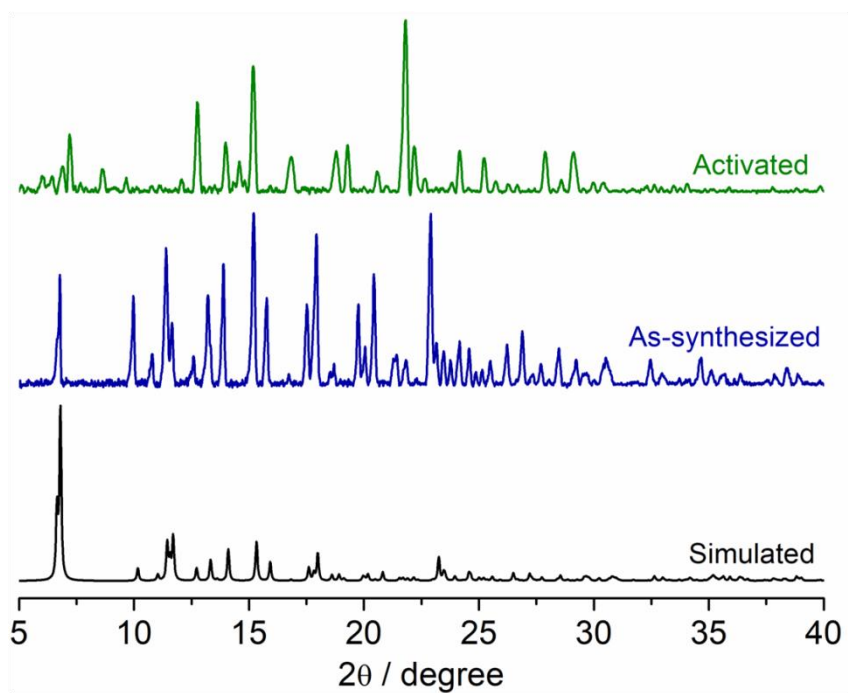

**Figure S31:** Powder X-ray diffraction patterns of **IPM-311**, simulated (grey), as-synthesized (blue), activated (green).

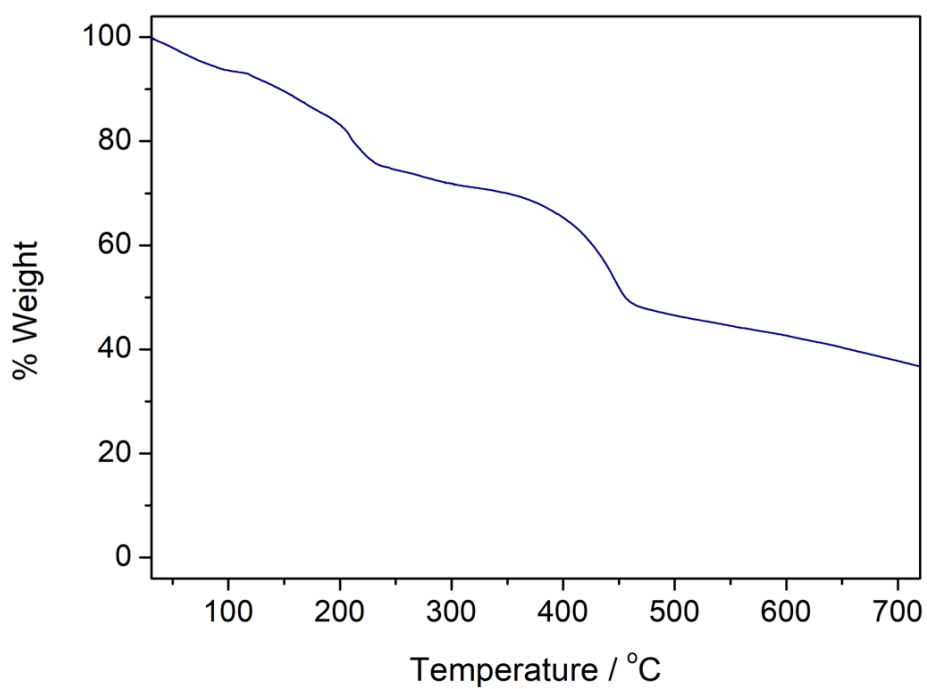

**Figure S32:** TGA profile for compound **IPM-311**.

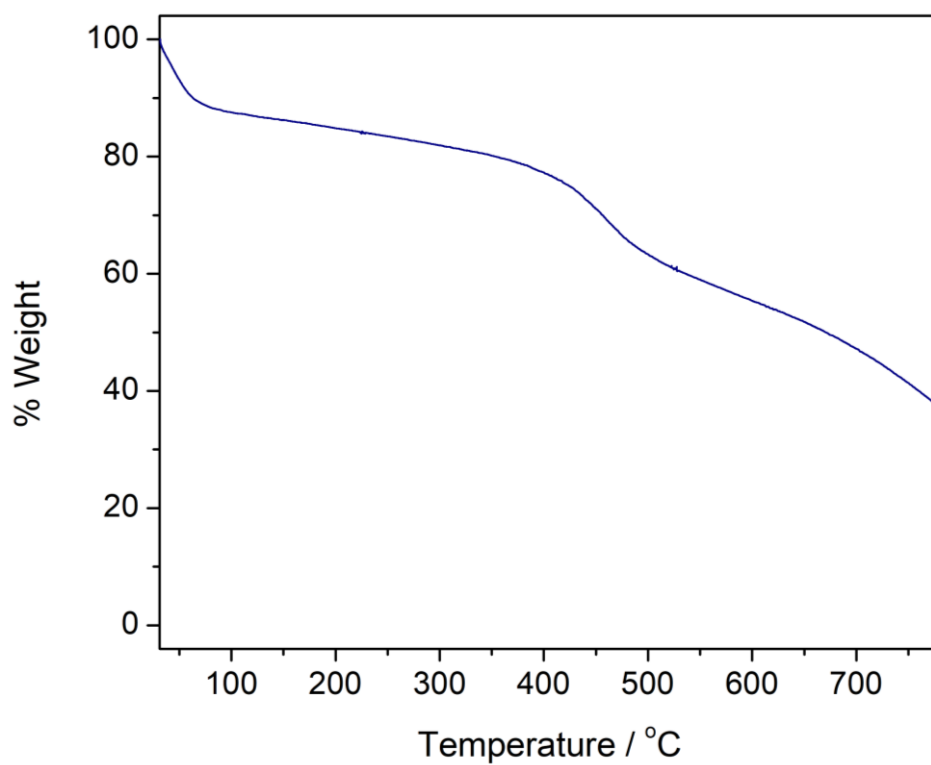

**Figure S33:** TGA profile for compound **IPM-312**.

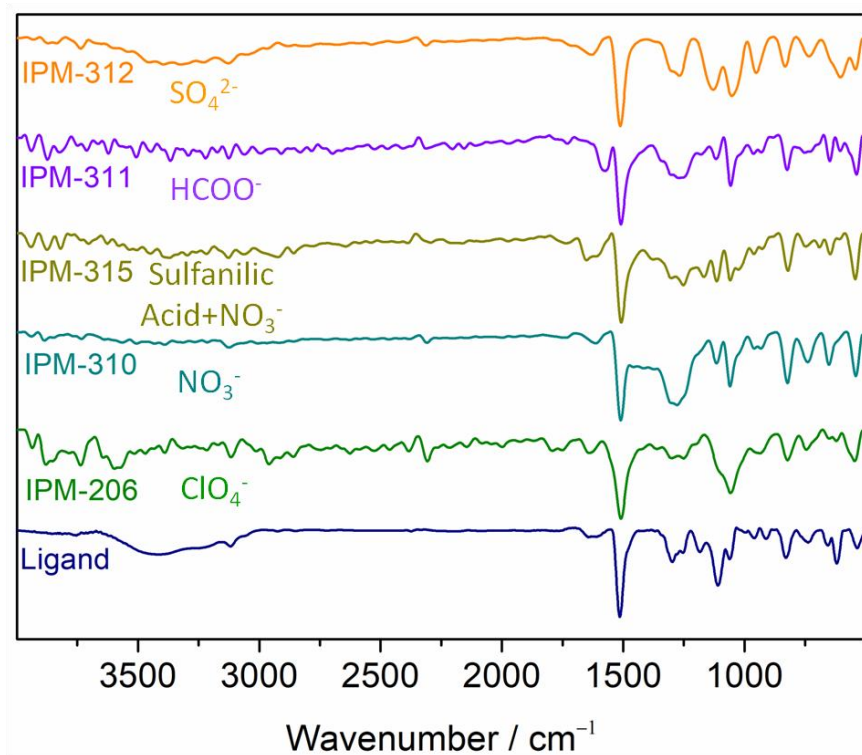

**Figure S34:** FT-IR profiles for ligand and all the compounds.

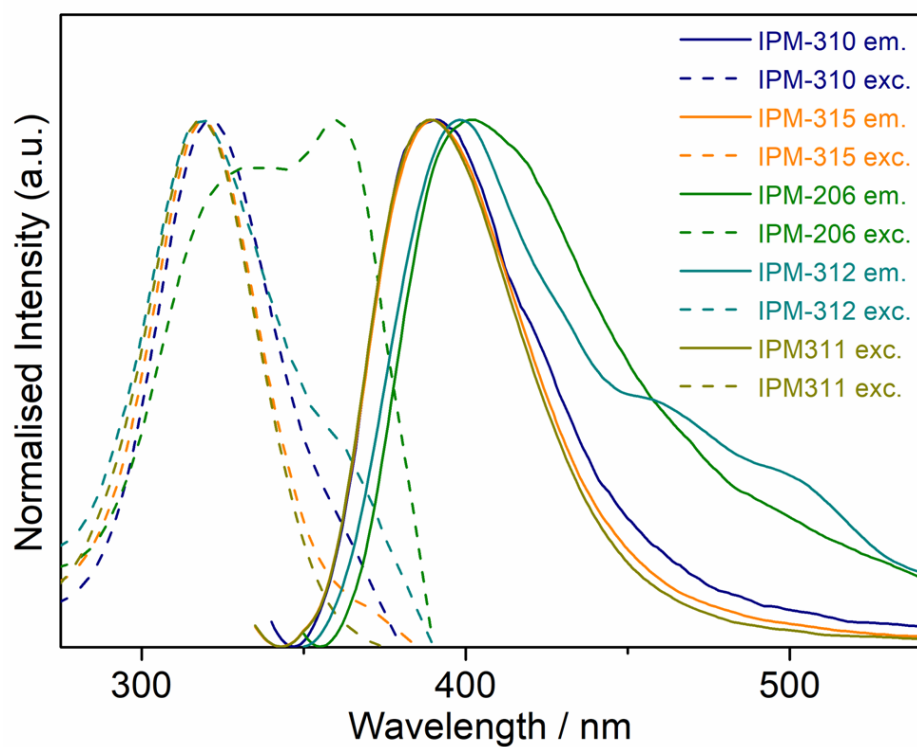

**Figure S35:** Excitation and emission profiles for various compounds.

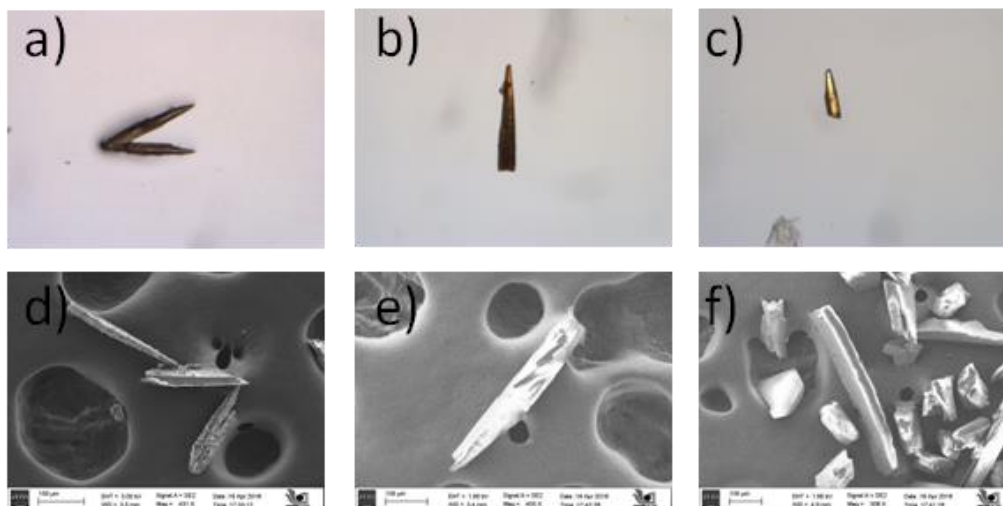

**Figure S36:** Naked eye images of **IPM-206**; a) As-synthesized, b)  $\text{MnO}_4^-$  exchanged, c)  $\text{ReO}_4^-$  exchanged, & SEM image of d) As-synthesized, e)  $\text{MnO}_4^-$  exchanged, f)  $\text{ReO}_4^-$  exchanged.

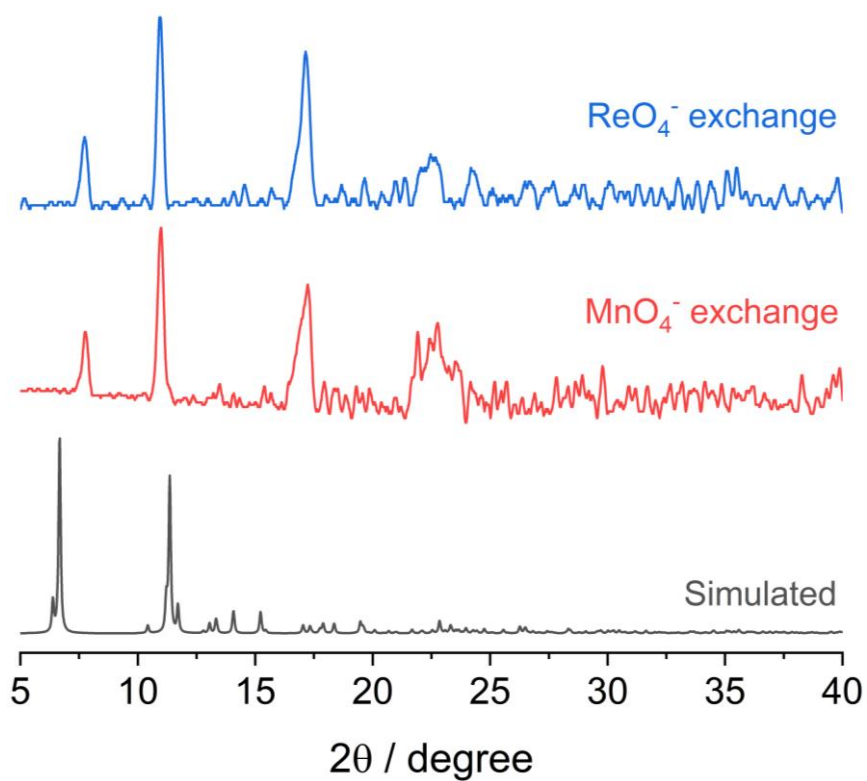

**Figure S37:** PXRD patterns for **IPM-206** - simulated, MnO<sub>4</sub><sup>-</sup> exchanged, ReO<sub>4</sub><sup>-</sup> exchanged.

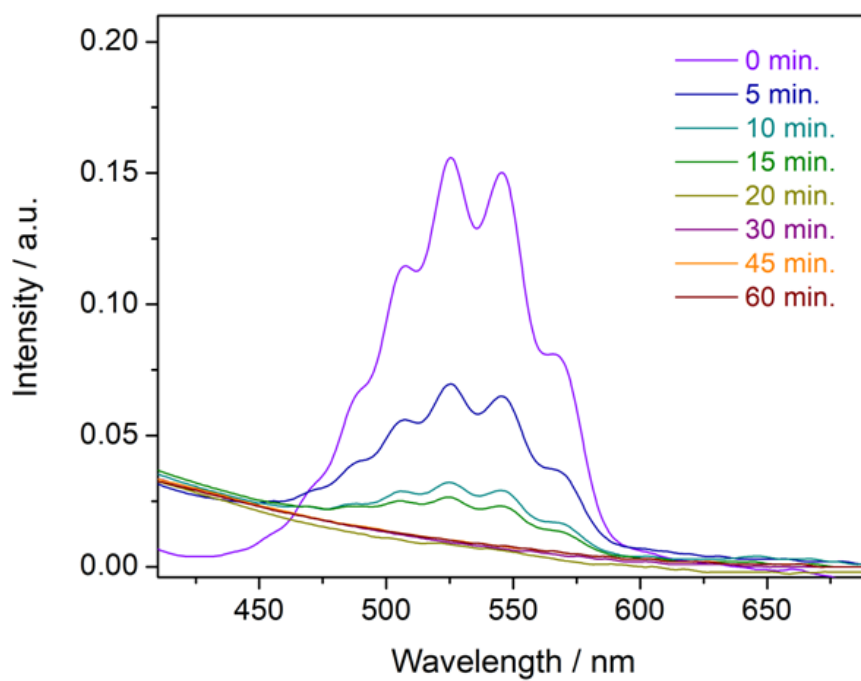

**Figure S38:** UV-Vis absorption spectra of MnO<sub>4</sub><sup>-</sup> after addition of **IPM-206** at different intervals.

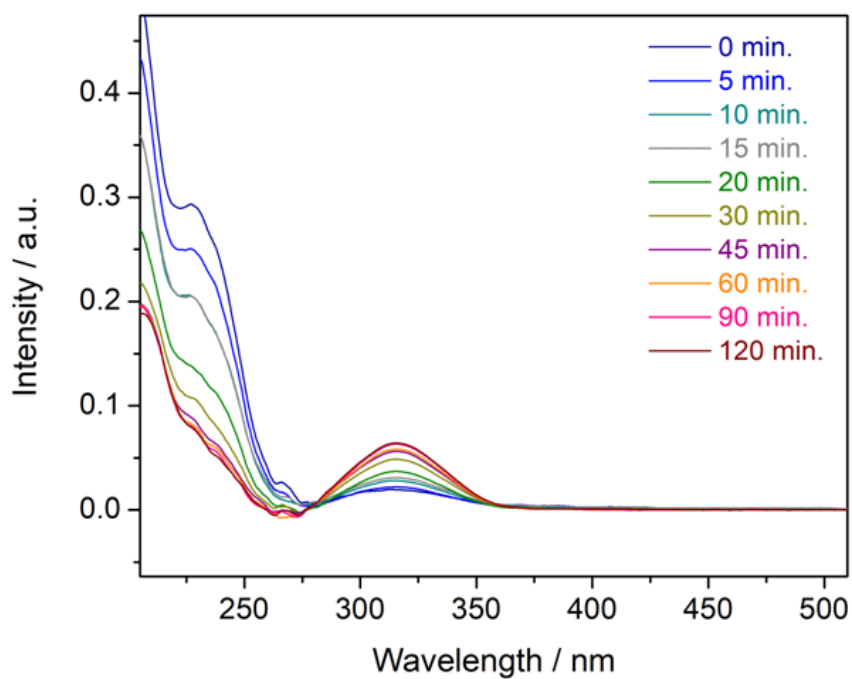

**Figure S39:** UV-Vis absorption spectra of  $\text{ReO}_4^-$  after addition of **IPM-206** at different intervals.

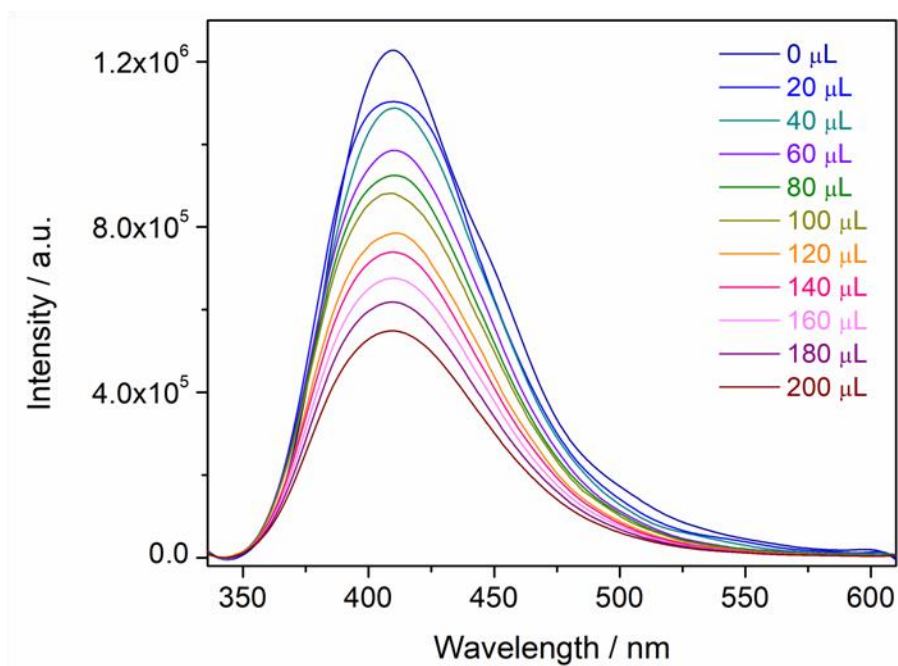

**Figure S40:** Fluorescence emission spectra of  $\text{MnO}_4^-$  after addition of **IPM-206** at different intervals.

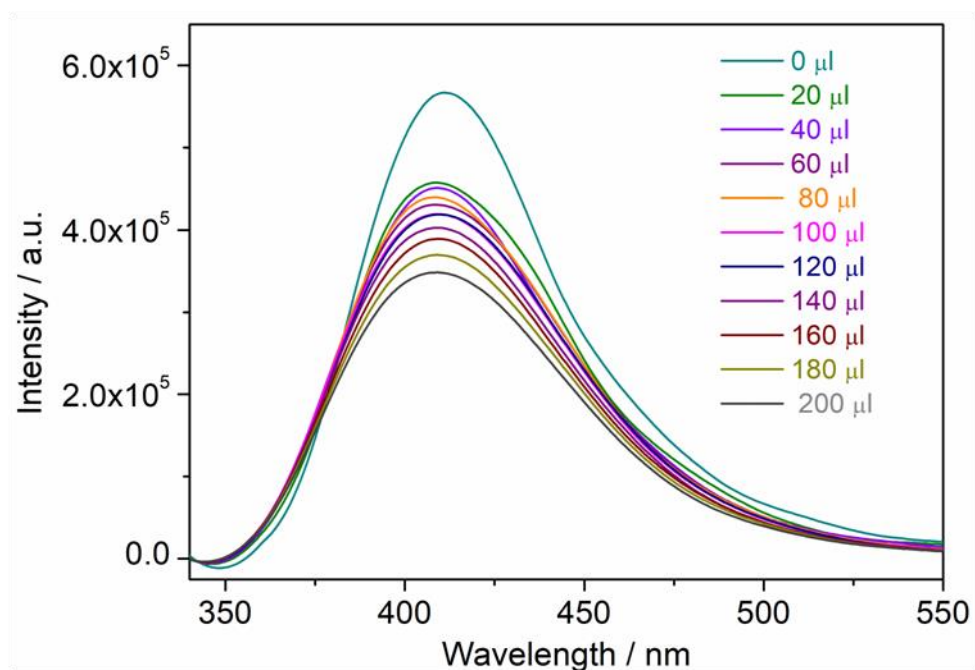

**Figure S41:** Fluorescence emission spectra of  $\text{ReO}_4^-$  after addition of IPM-206 at different intervals.

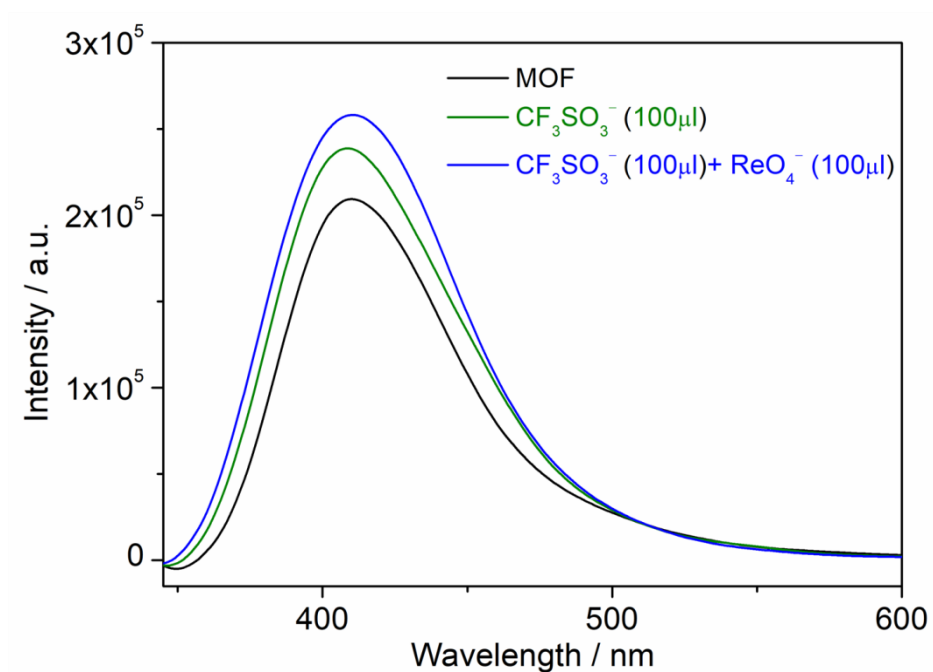

**Figure S42:** Fluorescence emission spectra of IPM-206 after addition of different analytes.

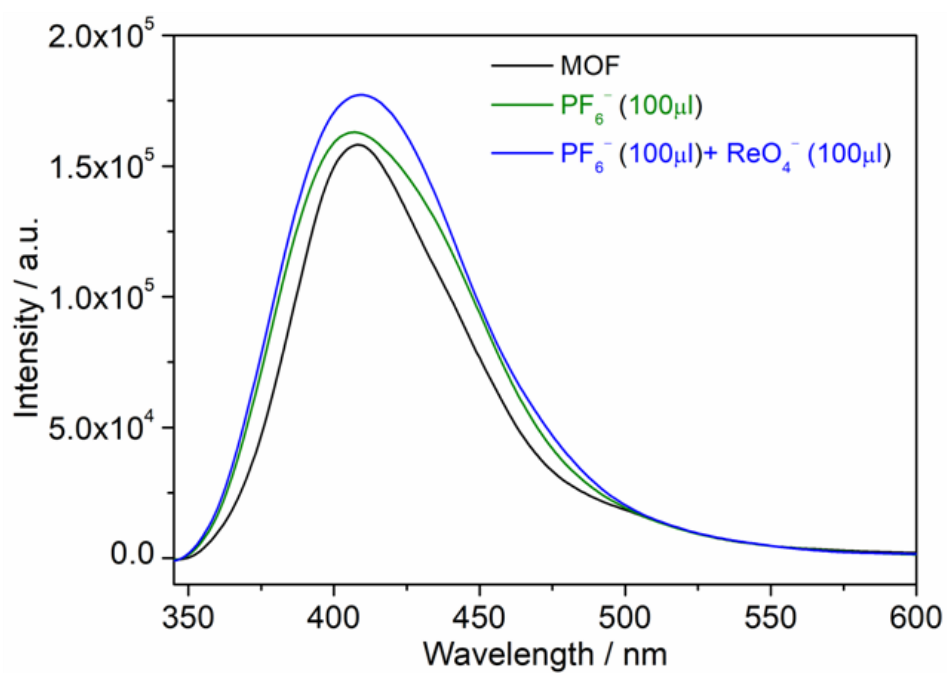

**Figure S43:** Fluorescence emission spectra of **IPM-206** after addition of different analytes.

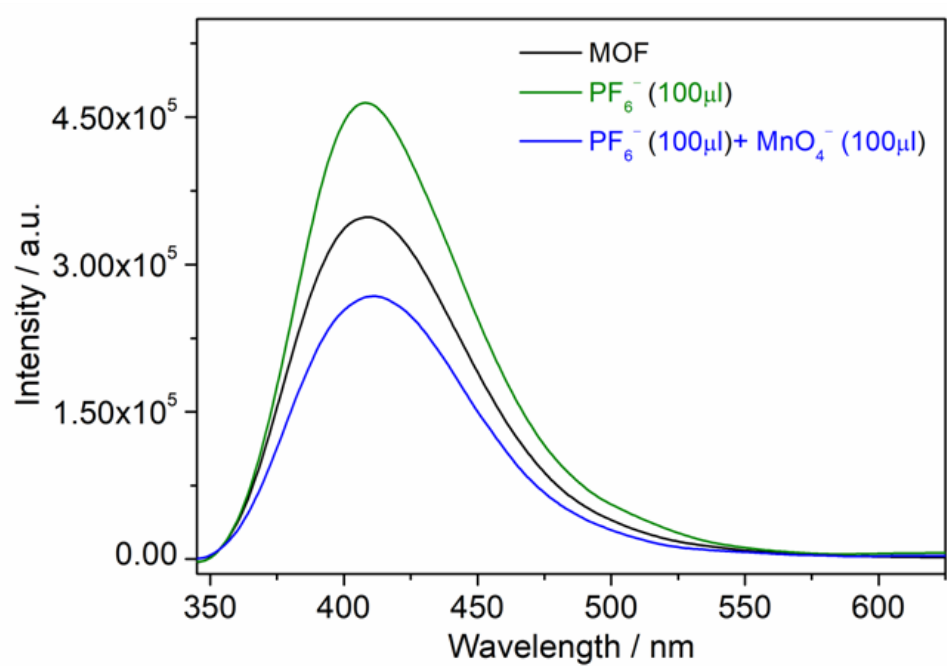

**Figure S44:** Fluorescence emission spectra of **IPM-206** after addition of different analytes.

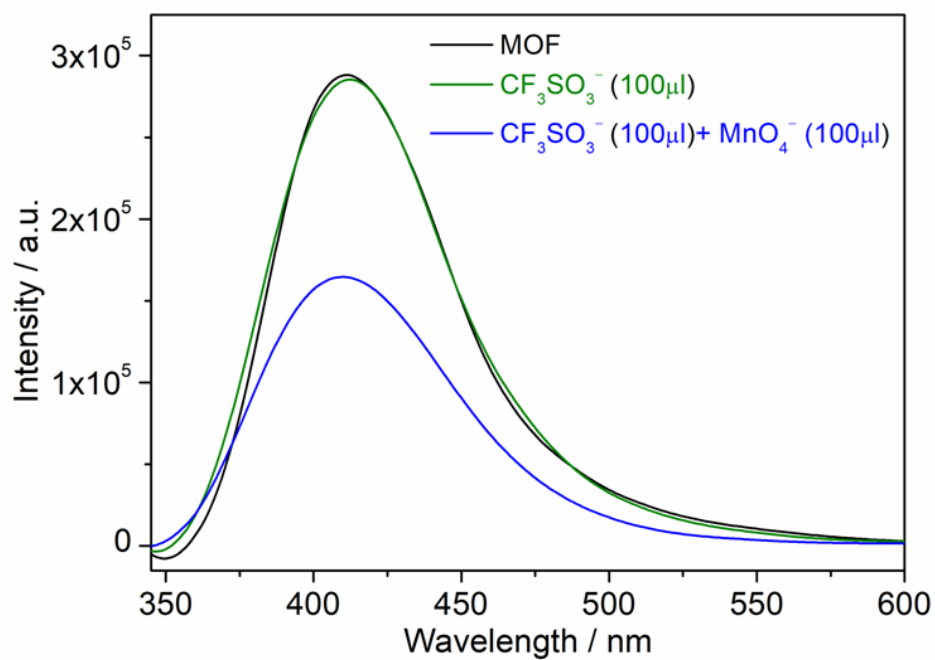

**Figure S45:** Fluorescence emission spectra of **IPM-206** after addition of different analytes.

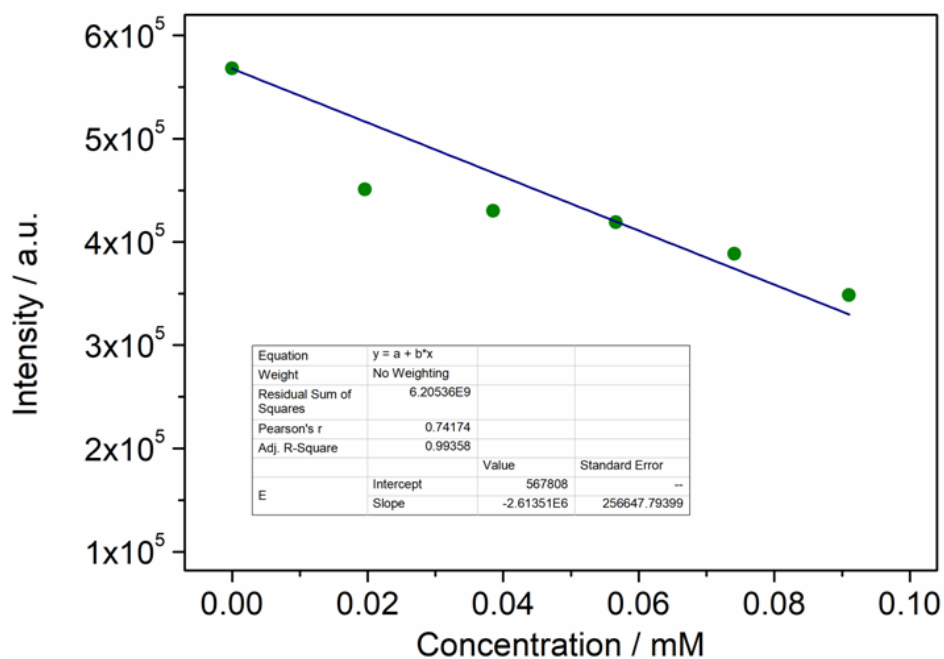

**Figure S46:** Linear region in the Fluorescence emission spectra after addition of  $\text{ReO}_4^-$  to **IPM-206** at  $\lambda_{\text{em}} = 410\text{nm}$  ( $\lambda_{\text{exc.}} = 325\text{nm}$ ) ( $R^2 = 99.35\%$ ).



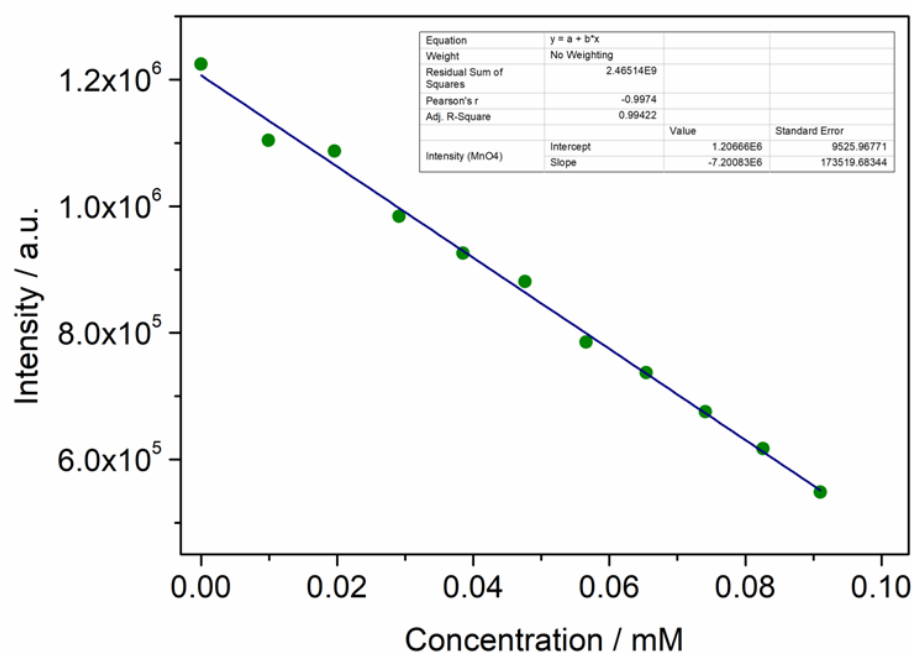

**Figure S47:** Linear region in the Fluorescence emission spectra after addition of  $\text{MnO}_4^-$  to **IPM-206** at  $\lambda_{\text{em}} = 410\text{nm}$  ( $\lambda_{\text{exc}} = 325\text{nm}$ ) ( $R^2 = 99.42\%$ ).

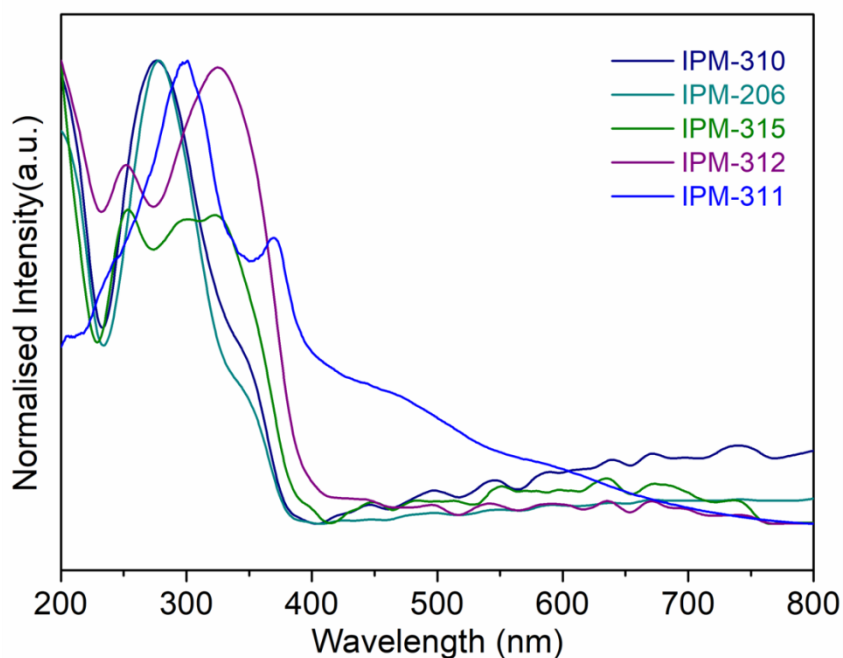

**Figure S48:** Solid State UV-Vis absorption profiles for **IPM-310** (Blue), **IPM-206** (cyan), **IPM-315** (green), **IPM-312** (violet) and **IPM-311** (bright blue).

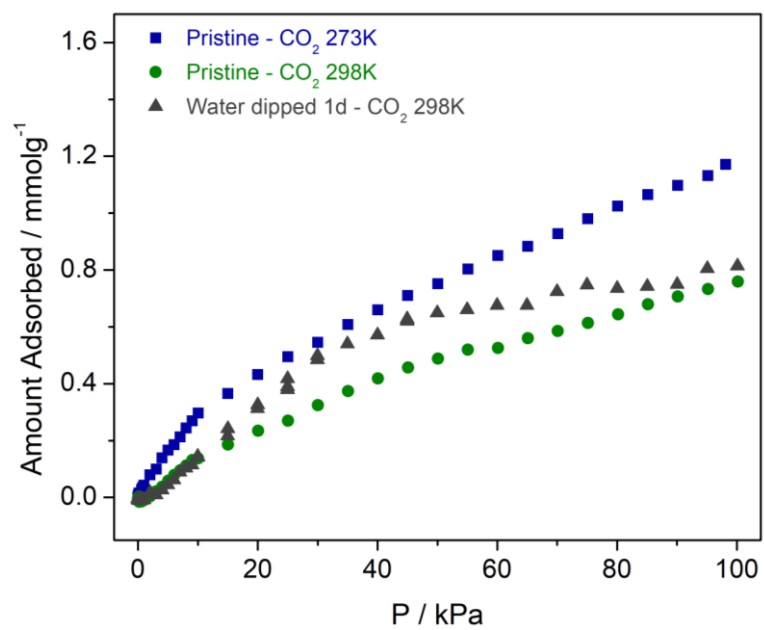

**Figure S49:** CO<sub>2</sub> adsorption isotherm for **IPM-312** after dipping in water.

**Table 1.** Crystal data and structure refinement for **IPM-206**.

|                                   |                                             |                            |
|-----------------------------------|---------------------------------------------|----------------------------|
| Identification code               | IPM-206 (CCDC 1846341)                      |                            |
| Empirical formula                 | $C_{54} H_{42} Cd N_{14}$                   |                            |
| Formula weight                    | 999.41                                      |                            |
| Temperature                       | 150(2) K                                    |                            |
| Wavelength                        | 0.71073 Å                                   |                            |
| Crystal system                    | Monoclinic                                  |                            |
| Space group                       | $C2/c$                                      |                            |
| Unit cell dimensions              | $a = 30.2102(19)$ Å                         | $\alpha = 90^\circ$        |
|                                   | $b = 8.9486(6)$ Å                           | $\beta = 118.440(2)^\circ$ |
|                                   | $c = 31.4489(17)$ Å                         | $\gamma = 90^\circ$        |
| Volume                            | 7475.8(8) Å <sup>3</sup>                    |                            |
| Z                                 | 4                                           |                            |
| Density (calculated)              | 0.888 Mg/m <sup>3</sup>                     |                            |
| Absorption coefficient            | 0.326 mm <sup>-1</sup>                      |                            |
| F(000)                            | 2048                                        |                            |
| Crystal size                      | 0.14 x 0.12 x 0.10 mm <sup>3</sup>          |                            |
| Theta range for data collection   | 2.402 to 28.344°.                           |                            |
| Index ranges                      | -40 ≤ h ≤ 40, -11 ≤ k ≤ 11, -41 ≤ l ≤ 38    |                            |
| Reflections collected             | 113594                                      |                            |
| Independent reflections           | 9296 [R(int) = 0.0974]                      |                            |
| Completeness to theta = 28.42°    | 100.0 %                                     |                            |
| Refinement method                 | Full-matrix least-squares on F <sup>2</sup> |                            |
| Data / restraints / parameters    | 9296 / 0 / 313                              |                            |
| Goodness-of-fit on F <sup>2</sup> | 1.100                                       |                            |
| Final R indices [I > 2σ(I)]       | $R_1 = 0.0482$ , $wR_2 = 0.1128$            |                            |
| R indices (all data)              | $R_1 = 0.0885$ , $wR_2 = 0.1307$            |                            |
| Largest diff. peak and hole       | 0.450 and -0.392 e.Å <sup>-3</sup>          |                            |

**Table 2.** Crystal data and structure refinement for **IPM-310**.

|                                                        |                                                                  |                         |  |
|--------------------------------------------------------|------------------------------------------------------------------|-------------------------|--|
| Identification code                                    | IPM-310 (CCDC 1846342)                                           |                         |  |
| Empirical formula                                      | C <sub>27</sub> H <sub>21</sub> N <sub>9</sub> Cd O <sub>6</sub> |                         |  |
| Formula weight                                         | 679.93                                                           |                         |  |
| Temperature                                            | 150(2) K                                                         |                         |  |
| Wavelength                                             | 0.71073 Å                                                        |                         |  |
| Crystal system                                         | Triclinic                                                        |                         |  |
| Space group                                            | <i>P</i> -1                                                      |                         |  |
| Unit cell dimensions                                   | <i>a</i> = 11.984(4) Å                                           | $\alpha$ = 73.727(10)°  |  |
|                                                        | <i>b</i> = 12.573(4) Å                                           | $\beta$ = 73.273 (10)°  |  |
|                                                        | <i>c</i> = 14.220(5) Å                                           | $\gamma$ = 84.150 (12)° |  |
| Volume                                                 | 1969.1(11) Å <sup>3</sup>                                        |                         |  |
| <i>Z</i>                                               | 2                                                                |                         |  |
| Density (calculated)                                   | 1.147 Mg/m <sup>3</sup>                                          |                         |  |
| Absorption coefficient                                 | 0.597 mm <sup>-1</sup>                                           |                         |  |
| <i>F</i> (000)                                         | 684                                                              |                         |  |
| Crystal size                                           | 0.12 x 0.11 x 0.10 mm <sup>3</sup>                               |                         |  |
| Theta range for data collection                        | 2.421 to 28.396°.                                                |                         |  |
| Index ranges                                           | -15<= <i>h</i> <=14, -16<= <i>k</i> <=16, -18<= <i>l</i> <=18    |                         |  |
| Reflections collected                                  | 39207                                                            |                         |  |
| Independent reflections                                | 9768 [ <i>R</i> (int) = 0.0540]                                  |                         |  |
| Completeness to theta = 28.42°                         | 99.9 %                                                           |                         |  |
| Refinement method                                      | Full-matrix least-squares on <i>F</i> <sup>2</sup>               |                         |  |
| Data / restraints / parameters                         | 9768 / 0 / 388                                                   |                         |  |
| Goodness-of-fit on <i>F</i> <sup>2</sup>               | 1.035                                                            |                         |  |
| Final <i>R</i> indices [ <i>I</i> >2sigma( <i>I</i> )] | <i>R</i> <sub>1</sub> = 0.0430, <i>wR</i> <sub>2</sub> = 0.1054  |                         |  |
| <i>R</i> indices (all data)                            | <i>R</i> <sub>1</sub> = 0.0642, <i>wR</i> <sub>2</sub> = 0.1160  |                         |  |
| Largest diff. peak and hole                            | 1.922 and -0.636 e.Å <sup>-3</sup>                               |                         |  |

**Table 3.** Crystal data and structure refinement for **IPM-315**.

|                                   |                                                                    |                       |  |
|-----------------------------------|--------------------------------------------------------------------|-----------------------|--|
| Identification code               | IPM-315 (CCDC 1846347)                                             |                       |  |
| Empirical formula                 | $C_{36} H_{34} N_{10} Cd O_7 S$                                    |                       |  |
| Formula weight                    | 863.19                                                             |                       |  |
| Temperature                       | 150(2) K                                                           |                       |  |
| Wavelength                        | 0.71073 Å                                                          |                       |  |
| Crystal system                    | Orthorhombic                                                       |                       |  |
| Space group                       | $P2_12_12_1$                                                       |                       |  |
| Unit cell dimensions              | $a = 8.9284(4)$ Å                                                  | $\alpha = 90^\circ$ . |  |
|                                   | $b = 14.0416(7)$ Å                                                 | $\beta = 90^\circ$ .  |  |
|                                   | $c = 28.6683(14)$ Å                                                | $\gamma = 90^\circ$ . |  |
| Volume                            | $3594.1(3)$ Å <sup>3</sup>                                         |                       |  |
| Z                                 | 4                                                                  |                       |  |
| Density (calculated)              | 1.595 Mg/m <sup>3</sup>                                            |                       |  |
| Absorption coefficient            | 0.731 mm <sup>-1</sup>                                             |                       |  |
| F(000)                            | 1760                                                               |                       |  |
| Crystal size                      | 0.12 x 0.10 x 0.08 mm <sup>3</sup>                                 |                       |  |
| Theta range for data collection   | 2.389 to 28.362°.                                                  |                       |  |
| Index ranges                      | $-11 \leq h \leq 11$ , $-18 \leq k \leq 18$ , $-38 \leq l \leq 38$ |                       |  |
| Reflections collected             | 89134                                                              |                       |  |
| Independent reflections           | 8957 [R(int) = 0.1167]                                             |                       |  |
| Completeness to theta = 28.42°    | 99.9 %                                                             |                       |  |
| Refinement method                 | Full-matrix least-squares on F <sup>2</sup>                        |                       |  |
| Data / restraints / parameters    | 8957 / 6 / 498                                                     |                       |  |
| Goodness-of-fit on F <sup>2</sup> | 1.035                                                              |                       |  |
| Final R indices [I > 2sigma(I)]   | $R_1 = 0.0616$ , $wR_2 = 0.1437$                                   |                       |  |
| R indices (all data)              | $R_1 = 0.1019$ , $wR_2 = 0.1608$                                   |                       |  |
| Largest diff. peak and hole       | 1.713 and -1.366 e.Å <sup>-3</sup>                                 |                       |  |

**Table 4.** Crystal data and structure refinement for **IPM-311**.

|                                        |                                                              |                            |
|----------------------------------------|--------------------------------------------------------------|----------------------------|
| Identification code                    | IPM-311 (CCDC 1846344)                                       |                            |
| Empirical formula                      | $C_{29} H_{23} N_7 Cd O_4$                                   |                            |
| Formula weight                         | 645.94                                                       |                            |
| Temperature                            | 150(2) K                                                     |                            |
| Wavelength                             | 0.71073 Å                                                    |                            |
| Crystal system                         | Monoclinic                                                   |                            |
| Space group                            | $C2$                                                         |                            |
| Unit cell dimensions                   | $a = 26.535(2)$ Å                                            | $\alpha = 90^\circ$        |
|                                        | $b = 15.453(2)$ Å                                            | $\beta = 101.627(4)^\circ$ |
|                                        | $c = 8.8765(9)$ Å                                            | $\gamma = 90^\circ$        |
| Volume                                 | $3565(7)$ Å <sup>3</sup>                                     |                            |
| Z                                      | 4                                                            |                            |
| Density (calculated)                   | 1.203 Mg/m <sup>3</sup>                                      |                            |
| Absorption coefficient                 | 0.650 mm <sup>-1</sup>                                       |                            |
| F(000)                                 | 1304                                                         |                            |
| Crystal size                           | 0.18 x 0.16 x 0.14 mm <sup>3</sup>                           |                            |
| Theta range for data collection        | 2.343 to 28.280°.                                            |                            |
| Index ranges                           | $-34 \leq h \leq 35, -20 \leq k \leq 20, -10 \leq l \leq 11$ |                            |
| Reflections collected                  | 43878                                                        |                            |
| Independent reflections                | 8814 [ $R(\text{int}) = 0.1057$ ]                            |                            |
| Completeness to $\theta = 28.42^\circ$ | 99.9 %                                                       |                            |
| Refinement method                      | Full-matrix least-squares on $F^2$                           |                            |
| Data / restraints / parameters         | 8814 / 7 / 371                                               |                            |
| Goodness-of-fit on $F^2$               | 0.981                                                        |                            |
| Final R indices [ $I > 2\sigma(I)$ ]   | $R_1 = 0.0504, wR_2 = 0.0968$                                |                            |
| R indices (all data)                   | $R_1 = 0.1214, wR_2 = 0.1167$                                |                            |
| Largest diff. peak and hole            | 0.546 and -0.448 e.Å <sup>-3</sup>                           |                            |

**Table 5.** Crystal data and structure refinement for **IPM-312**.

|                                                     |                                                                 |                             |
|-----------------------------------------------------|-----------------------------------------------------------------|-----------------------------|
| Identification code                                 | IPM-312 (CCDC 1846346)                                          |                             |
| Empirical formula                                   | $C_{54} H_{42} N_{14} Cd_2 O_8 S_2$                             |                             |
| Formula weight                                      | 1303.93                                                         |                             |
| Temperature                                         | 150(2) K                                                        |                             |
| Wavelength                                          | 1.54178 Å                                                       |                             |
| Crystal system                                      | Triclinic                                                       |                             |
| Space group                                         | <i>P</i> -1                                                     |                             |
| Unit cell dimensions                                | $a = 15.9617(11)$ Å                                             | $\alpha = 113.108(4)^\circ$ |
|                                                     | $b = 16.1208(11)$ Å                                             | $\beta = 113.283(4)^\circ$  |
|                                                     | $c = 16.3842(11)$ Å                                             | $\gamma = 99.327(5)^\circ$  |
| Volume                                              | 3301.3(4) Å <sup>3</sup>                                        |                             |
| Z                                                   | 2                                                               |                             |
| Density (calculated)                                | 1.312 Mg/m <sup>3</sup>                                         |                             |
| Absorption coefficient                              | 6.220 mm <sup>-1</sup>                                          |                             |
| F(000)                                              | 1312                                                            |                             |
| Crystal size                                        | 0.15 x 0.12 x 0.10 mm <sup>3</sup>                              |                             |
| Theta range for data collection                     | 3.216 to 67.393°.                                               |                             |
| Index ranges                                        | -18 ≤ <i>h</i> ≤ 19, -19 ≤ <i>k</i> ≤ 19, -16 ≤ <i>l</i> ≤ 19   |                             |
| Reflections collected                               | 24186                                                           |                             |
| Independent reflections                             | 11522 [ <i>R</i> (int) = 0.0704]                                |                             |
| Completeness to theta = 28.42°                      | 97.0 %                                                          |                             |
| Refinement method                                   | Full-matrix least-squares on <i>F</i> <sup>2</sup>              |                             |
| Data / restraints / parameters                      | 11522 / 36 / 721                                                |                             |
| Goodness-of-fit on <i>F</i> <sup>2</sup>            | 0.936                                                           |                             |
| Final <i>R</i> indices [ <i>I</i> > 2σ( <i>I</i> )] | <i>R</i> <sub>1</sub> = 0.0800, <i>wR</i> <sub>2</sub> = 0.2361 |                             |
| <i>R</i> indices (all data)                         | <i>R</i> <sub>1</sub> = 0.1170, <i>wR</i> <sub>2</sub> = 0.2652 |                             |
| Largest diff. peak and hole                         | 3.778 and -2.110 e.Å <sup>-3</sup>                              |                             |
